# Supplementary material
Source: publisher site journal article supplement (https://www.dovepress.com/article/511112)
Supplement: Supplementary file 1 [file get_supplementary_file.php]

**Supplementary information 1:** Trial protocol

Effect of esketamine-based opioid-sparing anesthesia protocol on the quality of early recovery after urological surgery: A randomized clinical trial

**Chinese Clinical Trial Registry Identifier:** ChiCTR2300071295

**Ethical approval:** Ethical approval for this study (No. XZXY-LK-20230427-059) was provided by the Institutional Review Board at Xuzhou Central Hospital, Jiangsu, China, on 27 April 2023.

**Study Design Brief Summary**

Study Type: Randomized controlled trial

Estimated sample size: 106 subjects

Allocation: Randomized

Group: OSA group and control group

Blinding: Double (Participant, Investigator)

Primary outcome: The Quality of Recovery Scale-15 (QoR-15) score 24 hours after surgery.

**Data**

Original protocol date: April 2023

Final protocol date: May 2023

**1. Inclusion/Exclusion/Drop criteria**

**1.1 Inclusion criteria**

1. Patients aged 18-65 years old;
2. American Society of Anesthesiologists (ASA) physical status grades I-III (I: healthy patient, II: patient with mild systemic disease, and III: patient with severe systemic disease); and
3. those undergoing elective laparoscopic partial nephrectomy or unilateral total nephrectomy under general anesthesia with tracheal intubation.
4. those with an operation duration of 1-3 hours and willing to use patient-controlled intravenous analgesia (PCIA).

**1.2 Exclusion criteria**

1. Patients refusing to participate;
2. those with severe hypertension, pulmonary hypertension, or excessively high intracranial or intraocular pressure;
3. those with diseases of vital organs such as heart, liver, lung, and kidney and unable to tolerate the surgery;
4. those with a history of central nervous system diseases;
5. those allergic to esketamine or other anesthetic drugs;
6. those with cognitive impairment or inability to communicate;

**1.3 Drop criteria**

1. Drugs used not per this plan;
2. patients without any monitoring records or whose case report form records are incomplete;
3. surgeons changed the operation plan; and
4. serious adverse events such as cardiac arrest and pulmonary embolism occur during the perioperative period.

**2. Randomization Procedure**

A researcher who was not involved in patient recruitment, coordination, data collection, or outcome assessment generated the random sequence in a 1:1 ratio (block randomization with a block size of 4) using the SPSS 26.0 software. The random results were concealed in sequentially numbered and sealed opaque envelopes. Before anesthesia induction, a researcher who was unaware of the randomization procedure opened the envelopes and assigned patients to the opioid-sparing (OSA) group or the control group according to the random sequence. The responsible anesthesiologists were informed about the study medications but received no information identifying individual patients' group assignments. Except for the different medications, all patients received standardized intraoperative management and monitoring. Subjects, clinicians except for anesthesiologists, and the researchers responsible for patient recruitment and outcome assessment were completely blinded to the group allocation. The outcome assessors did not access the anesthesia records and were not involved in the treatment of patients. The PCIA pump was placed in an opaque bag with all identifying labels removed to ensure blinding.

**3. Anesthesia Protocol**

**3.1 Preoperative management**

Heart rate, oxygen saturation, respiratory rate, body temperature, end-tidal carbon dioxide, mean arterial pressure, electrocardiogram, fluid infusion volume, urinary volume, and bispectral index (BIS) were continuously monitored during the procedure. The BIS value was maintained at around 50. Furthermore, the surgical pleth index (SPI) was utilized to monitor intraoperative injury perception to assess the patient’s intraoperative analgesia level. A value of 20-50 indicates an appropriate analgesia level under general anesthesia. A value >50 indicates insufficient analgesia and requires an increase in the dose of analgesic drugs. A value <20 indicates excessive analgesia and requires a reduction in the infusion rate of analgesic drugs.

**3.2 General anesthesia induction**

Anesthesia was induced with esketamine 0.25 mg/kg, propofol 2 mg/kg, sufentanil 0.3 μg/kg, and cisatracurium besylate 0.15 mg/kg in the OSA group and propofol 2 mg/kg, sufentanil 0.4 μg/kg, and cisatracurium besylate 0.15 mg/kg in the control group.

**3.3 Anesthesia maintenance**

Anesthesia maintenance in both groups was achieved with propofol 4-12 mg·kg⁻¹·h⁻¹ and remifentanil 0.1-1.0 μg·kg⁻¹·min⁻¹, with intermittent supplementation of cisatracurium besylate. The OSA group was continuously infused with esketamine at a rate of 0.125 mg·kg⁻¹·h⁻¹, whereas the control group received an equal dose of normal saline. Esketamine infusion was stopped 20 minutes before the end of surgery in the OSA group. Propofol infusion was stopped in both groups when the skin was sutured and remifentanil infusion was stopped at the end of surgery.

**3.4 Postoperative Analgesia Management**

All patients received postoperative analgesia with a PCIA device. PCIA with sufentanil (0.015 μg·kg⁻¹·h⁻¹), esketamine (0.015 mg·kg⁻¹·h⁻¹), and tropisetron (10 mg) was used for the OSA group, and that with sufentanil (0.03 μg·kg⁻¹·h⁻¹) and tropisetron (10 mg) was used for the control group. PCIA parameters were as follows: total volume, 100 mL; continuous infusion rate, 2 mL/h for 48 hours; patient-controlled volume, 1.5 mL; and lockout time, 15 minutes. If the Numerical Rating Scale (NRS) was ≥4, an additional 50 mg of flurbiprofen was administered intravenously for rescue analgesia. PCIA infusion was suspended if the NRS score was always <1 and symptoms such as respiratory depression, confusion, or unstable blood pressure occurred. PCIA was resumed once these symptoms improved.

**5 Outcome Measures**

**5.1 Primary outcome:** The QoR-15 score 24 hours after surgery(Supplementary figure 1). QoR-15 consists of 15 items, each scored on a 10-point scale1. It comprises five subscales: pain (n = 2), physical comfort (n = 5), physical independence (n = 2), psychological support (n = 2), and emotional state (n = 4). The total score ranges from 0 to 150, with 0 indicating poor recovery and 150 indicating excellent recovery. The Chinese version of the QoR-15 scale used in this study was translated and developed by West China Hospital of Sichuan University based on the English version of the QoR-15 scale, and the authorization for its use was obtained2,3.

**5.2 Secondary outcomes:**

1. QoR-15 scores 48 and 72 hours after surgery;
2. the anesthesia recovery level in the post-anesthesia care unit (PACU);
3. the total consumption of opioids during surgery and within 48 hours after surgery;
4. intraoperative hemodynamics;
5. the incidence of moderate-to-severe postoperative pain within 0-24 hours and 24-48 hours after surgery;
6. the incidence of postoperative nausea and vomiting within 0-24 hours and 24-48 hours after surgery;
7. other postoperative adverse events.

**6 Adverse Events**

Adverse events are related to the time of use of experimental drugs, whether or not it is related to the drug being used. Adverse events can be any undesirable and unexpected symptom or sign that happens during the time of use of the drugs, as well as abnormalities in laboratory test indicators, exacerbation of the original disease, and drug ineffectiveness, abuse, and misuse.

**7 Record Cardiovascular Events Occurring During Hospitalization**

1. Bradycardia: heart rate <40 beats/minute or decreased by 20% from baseline value; intravenous atropine 0.3 mg (to be used in the absence of contraindications) or 2 µg of isoproterenol or anesthetic dosage adjustment, as needed.
2. Tachycardia: heart rate >100 beats/minute or increased by >20% over the baseline value; intravenous esmolol 10 mg (to be used in in the absence of contraindications) or anesthetic dose adjustment, as needed.
3. Hypertension: blood pressure elevation of at least >20% from baseline or >160 mmHg; intravenous nicardipine 0.5 mg or anesthetic dose adjustment, as needed.
4. Hypotension: blood pressure reduction of at least >20% from baseline or <80 mmHg; intravenous fluids, ephedrine 6 mg, norepinephrine 4 µg, or anesthetic dose adjustment, as needed.
5. Serious arrhythmias: arrhythmias that can cause serious hemodynamic disorders, temporary loss of consciousness, or sudden death.
6. Angina pectoris and myocardial infarction: daily electroencephalogram (EEG) examination.
7. Heart failure.
8. Renal failure.

**8 Statistical Analysis Methods**

**8.1 Sample size**

In the pilot study, we obtained a mean postoperative Quality of Recovery-15 (QoR-15) score of 106.4 ± 10.2 in patients undergoing elective laparoscopic partial nephrectomy or unilateral total nephrectomy. Considering the minimum clinically important difference of 6 points in the QoR-15 score4, a sample size calculation was performed using PASS software (V.20.0.6, NCSS, Kaysville, USA). With a desired power of 80% and a significance level of 0.05, the calculated sample size was 47 patients per group. To account for a potential 10% dropout rate, a final sample size of 53 patients per group (106 total) was determined.

**8.2 Statistical methods**

The Shapiro-Wilk test was used to assess normality. Normally distributed continuous variables were expressed as mean ± standard deviation (SD) and compared using the t-test or Welch's t-test depending on the homogeneity of variance. Non-normally distributed continuous variables were expressed as the median (25th-75th percentiles) and compared using the Mann-Whitney U test. Categorical variables were expressed as frequency (percentage, %) and analyzed using the χ2 test or Fisher’s exact test, as appropriate. P < 0.05 was considered statistically significant. Statistical analyses were carried out using the SPSS 26.0 software, GraphPad Prism version 10.1 for Windows was utilized to generate graphs.

**References**

1. Stark PA, Myles PS, Burke JA. Development and Psychometric Evaluation of a Postoperative Quality of Recovery Score. *Anesthesiology*. 2013;118(6):1332-1340. doi:10.1097/ALN.0b013e318289b84b
2. Bu XS, Zhang J, Zuo YX. Validation of the chinese version of the quality of recovery-15 score and its comparison with the post-operative quality recovery scale. *The Patient*. 2016;9(3):251-259. doi:10.1007/s40271-015-0148-6
3. Bu XS, Zhang J, Zuo YX. Quality of Recovery Scale-15—Chinese Version. Published online September 12, 2016. doi:10.1037/t52555-000
4. Myles PS, Myles DB. An updated minimal clinically important difference for the QoR-15 scale. *Anesthesiology*. 2021;135(5):934-935. doi:10.1097/ALN.0000000000003977

**Supplementary figure 1.** The quality of recovery score (QoR)-15 questionnaire.

**Quality of Recovery Scale-15**

Date: _ _ / _ _ / _ _ Study #: __ __ ____ _

| PART A | | | | |
| --- | --- | --- | --- | --- |
| How have you been feeling in the last 24 hours? | | | | |
| (0 to 10, where: 0 = none of the time [poor] and 10 = all of the time [excellent]) | | | | |
| 1.Able to breathe easily |  | None of the time | 0 1 2 3 4 5 6 7 8 9 10 | All of the time |
| 2.Been able to enjoy food |  | None of the time | 0 1 2 3 4 5 6 7 8 9 10 | All of the time |
| 3.Feeling rested |  | None of the time | 0 1 2 3 4 5 6 7 8 9 10 | All of the time |
| 4.Have had a good sleep |  | None of the time | 0 1 2 3 4 5 6 7 8 9 10 | All of the time |
| 5.Able to look after personal toilet and hygiene unaided |  | None of the time | 0 1 2 3 4 5 6 7 8 9 10 | All of the time |
| 6.Able to communicate with family or friends |  | None of the time | 0 1 2 3 4 5 6 7 8 9 10 | All of the time |
| 7.Getting support from hospital doctors and nurses |  | None of the time | 0 1 2 3 4 5 6 7 8 9 10 | All of the time |
| 8.Able to return to work or usual home activities |  | None of the time | 0 1 2 3 4 5 6 7 8 9 10 | All of the time |
| 9.Feeling comfortable and in control |  | None of the time | 0 1 2 3 4 5 6 7 8 9 10 | All of the time |
| 10.Having a feeling of general well-being |  | None of the time | 0 1 2 3 4 5 6 7 8 9 10 | All of the time |
| PART B | | | | |
| Have you had any of the following in the last 24 hours? | | | | |
| (10 to 0, where: 10 = none of the time [excellent], and 0 = all of the time [poor]) | | | | |
| 11.Moderate pain |  | None of the time | 10 9 8 7 6 5 4 3 2 1 0 | All of the time |
| 12.Severe pain |  | None of the time | 10 9 8 7 6 5 4 3 2 1 0 | All of the time |
| 13.Nausea or vomiting |  | None of the time | 10 9 8 7 6 5 4 3 2 1 0 | All of the time |
| 14.Feeling worried or anxious |  | None of the time | 10 9 8 7 6 5 4 3 2 1 0 | All of the time |
| 15.Feeling sad or depressed |  | None of the time | 10 9 8 7 6 5 4 3 2 1 0 | All of the time |

**Supplementary table 1.** Postoperative 24 h QoR-15 Questionnaire Score

| **QoR-15 Items** | **OSA group (n=51)** | **Control group (n=50)** | **Median difference (95% CI)** | ***P* value** |
| --- | --- | --- | --- | --- |
| Able to breathe | 10[9,10] | 9.5[9,10] | 0.5(0,0) | 0.165 |
| Enjoy food | 4[3,6] | 4[4,5] | 0(-1,0) | 0.944 |
| Feeling rested | 7[5,8] | 7[6,8] | 0(-1,1) | 0.798 |
| Good sleep | 7[6,9] | 6[5,7] | 1(0,2) | 0.005a |
| Look after personal hygiene unaided | 4[2,5] | 4[3,5] | 0(-1,1) | 0.756 |
| Communicate with family and friends | 10[8,10] | 10[8,10] | 0(0,0) | 0.396 |
| Support from hospital doctors and nurses | 10[9,10] | 10[9,10] | 0(0,0) | 0.118 |
| Able to return to work or usual home activities | 3[2,3] | 2.5[1,4] | 0.5(0,1) | 0.337 |
| Feeling comfortable and in control | 7[7,8] | 7[5,7.25] | 0(0,1) | 0.010a |
| Feeling of general well-being | 7[4, 7] | 6[5,8] | 1(-1,1) | 0.643 |
| Moderate pain | 6[3,10] | 5[3,8] | 1(0,2) | 0.077 |
| Severe pain | 10[8,10] | 10[8,10] | 0(0,0) | 0.644 |
| Nausea or vomiting | 9[8,10] | 8[6,9] | 1(0,2) | 0.002a |
| Feeling worried or anxious | 10[9,10] | 10[8,10] | 0(0,0) | 0.048a |
| Feeling sad or depressed | 10[10,10] | 10[9.75,10] | 0(0,0) | 0.138 |
| Total QoR-15 score | 114[108,116] | 106[102,109] | 8(5,10) | <0.001a |

**Notes:** Data are presented as median (25th-75th percentiles), or n (%). a*P*<0.05.

**Abbreviations:** CI, confidence interval.

**Supplementary** **table 2.** Postoperative 48 h QoR-15 Questionnaire Score

| **QoR-15 Items** | **OSA group (n=51)** | **Control group (n=50)** | **Median difference (95% CI)** | ***P* value** |
| --- | --- | --- | --- | --- |
| Able to breathe | 10[9,10] | 10[9,10] | 0(0,0) | 0.349 |
| Enjoy food | 7[6,8] | 6[5,7.25] | 1(0,1) | 0.185 |
| Feeling rested | 8[7,9] | 8[7,8.25] | 0(0,1) | 0.006a |
| Good sleep | 9[8,9] | 8[8,9.25] | 1(0,1) | 0.639 |
| Look after personal hygiene unaided | 5[4,6] | 5[3,6] | 0(-1,1) | 0.929 |
| Communicate with family and friends | 10[9,10] | 10[9,10] | 0(0,0) | 0.211 |
| Support from hospital doctors and nurses | 10[10,10] | 10[10,10] | 0(0,0) | 0.890 |
| Able to return to work or usual home activities | 5[3,6] | 4.5[2.75,6] | 0.5(0,1) | 0.417 |
| Feeling comfortable and in control | 8[7,10] | 7[6,8] | 1(1,2) | 0.001a |
| Feeling of general well-being | 7[6,9] | 7[6,9] | 0(-1,1) | 0.761 |
| Moderate pain | 7[7,10] | 7[5,8.25] | 0(0,2) | 0.057 |
| Severe pain | 10[8,10] | 10[9,10] | 0(0,0) | 0.265 |
| Nausea or vomiting | 10[8,10] | 8.5[7,9.25] | 1.5(0,1) | 0.002a |
| Feeling worried or anxious | 9[9,10] | 9[9,10] | 0(0,0) | 0.857 |
| Feeling sad or depressed | 10[8,10] | 10[8.75,10] | 0(0,0) | 0.848 |
| Total QoR-15 score | 123[119,125] | 117[113,121] | 6(3,8) | <0.001a |

**Notes:** Data are presented as median (25th-75th percentiles), or n (%). a*P*<0.05.

**Abbreviations:** CI, confidence interval.

**Supplementary table 3.** Postoperative 72 h QoR-15 Questionnaire Score

| **QoR-15 Items** | **OSA group (n=51)** | **Control group (n=50)** | **Median difference (95% CI)** | ***P* value** |
| --- | --- | --- | --- | --- |
| Able to breathe | 10[10,10] | 10[10,10] | 0(0,0) | 0.235 |
| Enjoy food | 7[6,9] | 7[7,8] | 0(-1,1) | 0.810 |
| Feeling rested | 9[8,9] | 9[7,10] | 0(-1,1) | 0.947 |
| Good sleep | 9[7,10] | 8[7,9] | 1(0,0) | 0.569 |
| Look after personal hygiene unaided | 6[5,7] | 6[5,7.25] | 0(-1,1) | 0.815 |
| Communicate with family and friends | 10[9,10] | 10[9,10] | 0(0,0) | 0.781 |
| Support from hospital doctors and nurses | 9[9,10] | 10[9,10] | -1(0,0) | 0.236 |
| Able to return to work or usual home activities | 5[3,6] | 4[2.75,5.25] | 1(0,1) | 0.521 |
| Feeling comfortable and in control | 8[7,9] | 7.5[6,9] | 0.5(0,1) | 0.300 |
| Feeling of general well-being | 6[5,8] | 6.5[6,8] | 0.5(-1,0) | 0.468 |
| Moderate pain | 8[6,10] | 8[6,10] | 0(-1,0) | 0.567 |
| Severe pain | 10[8,10] | 10[9,10] | 0(0,0) | 0.172 |
| Nausea or vomiting | 10[10,10] | 10[10,10] | 0(0,0) | 0.643 |
| Feeling worried or anxious | 10[9,10] | 10[9,10] | 0(0,0) | 0.740 |
| Feeling sad or depressed | 9[9,10] | 9[9,10] | 0(0,0) | 0.364 |
| Total QoR-15 score | 123[121,127] | 123[118.75,127] | 0(-1,4) | 0.312 |

**Notes:** Data are presented as the median (25th-75th percentiles), or n (%).

**Abbreviations:** CI, confidence interval.


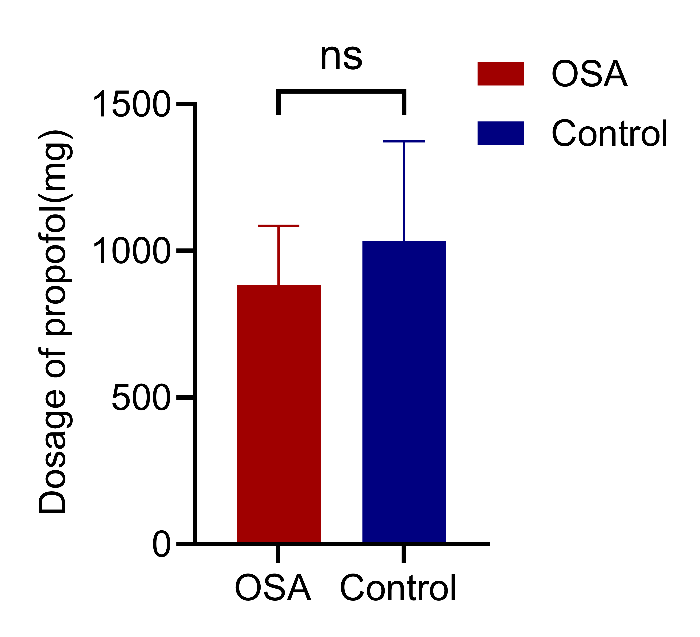


**Supplementary figure 2.** Comparison of perioperative propofol dosage between the OSA group and Control group.


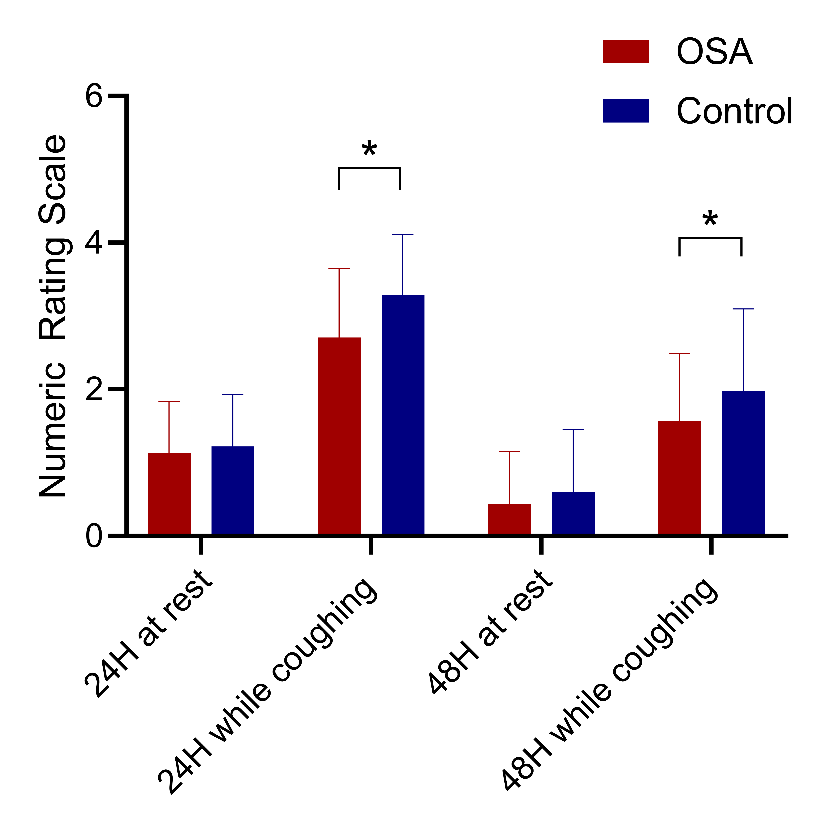


**Supplementary figure 3.** Comparison of NRS scores at rest and while coughing state at 24 hours and 48 hours between the OSA group and Control group. **P*<0.05.


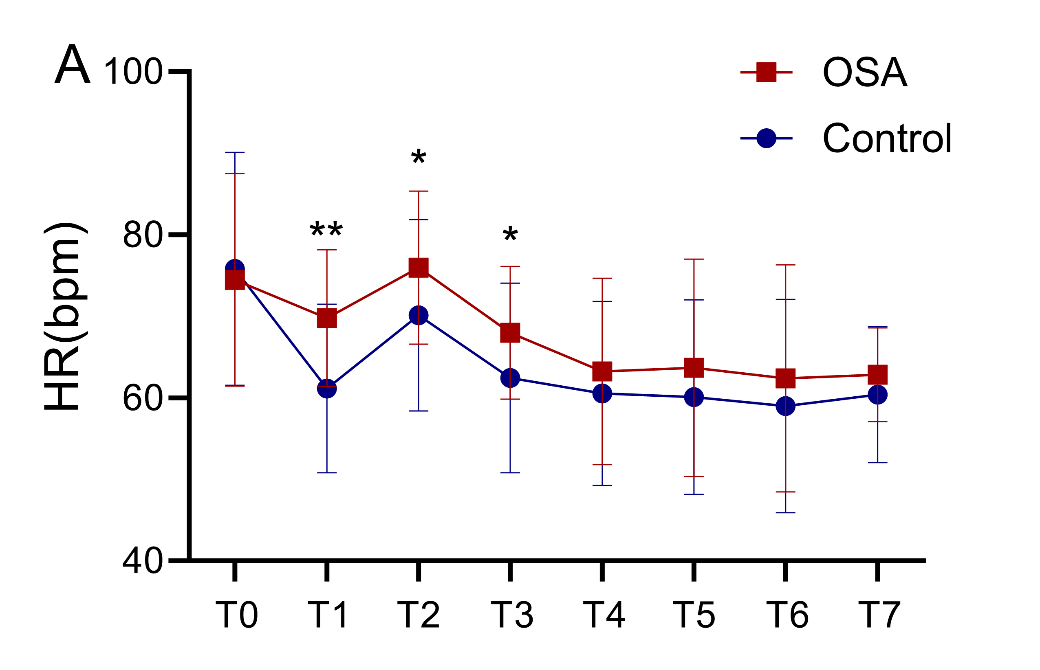


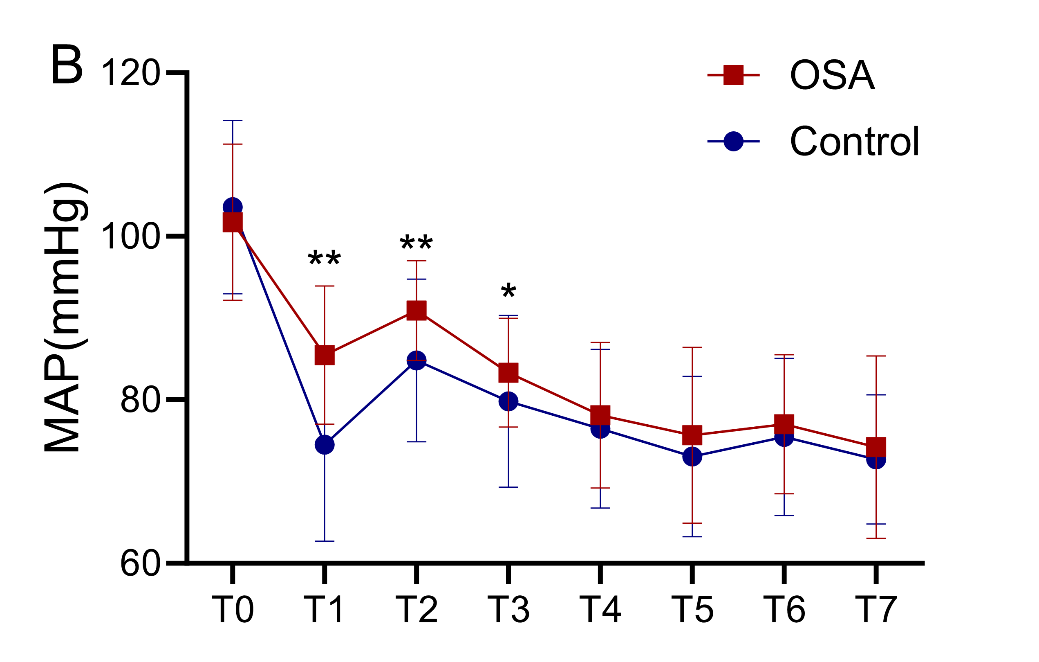


**Supplementary figure 4.** Comparison of hemodynamic parameters and between OSA group and Control group. Data are provided as mean ± standard deviation and data analysis employed RM-ANCOVA. MAP, mean arterial pressure, HR, heart rate. T0, before anesthesia induction. T1, after induction. T2, immediately after intubation. T3, at the time of skin incision. T4, 30 minutes after the start of surgery. T5, 60 minutes after the start of surgery. T6,90 minutes after the start of surgery. T7, at the end of surgery. **P*<0.05. ***P*<0.01.
